# Supplementary figures and images for: Direct growth of h-BN multilayers with controlled thickness on non-crystalline dielectric substrates without metal catalysts
Source: Royal Society of Chemistry journal article supplement (doi:10.1039/d2cc03025j), 2022-01-01

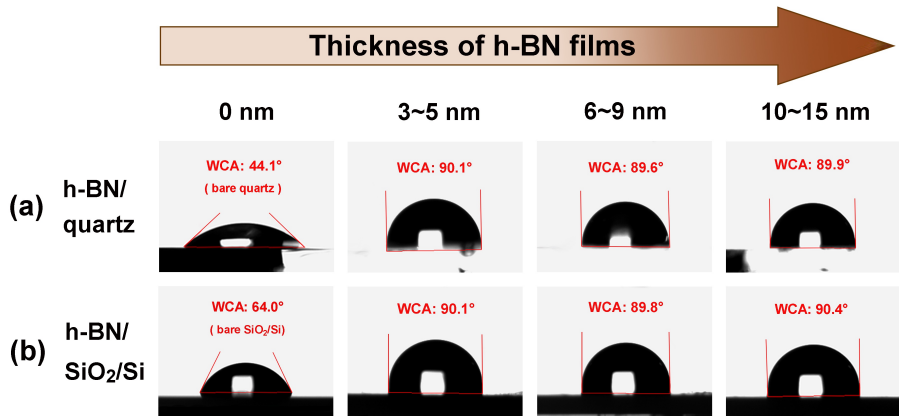

Supplement: d2cc03025j1.pdf [file d2cc03025j1.pdf]

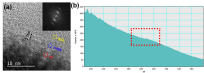

Supplement: d2cc03025j11.pdf [file d2cc03025j11.pdf]

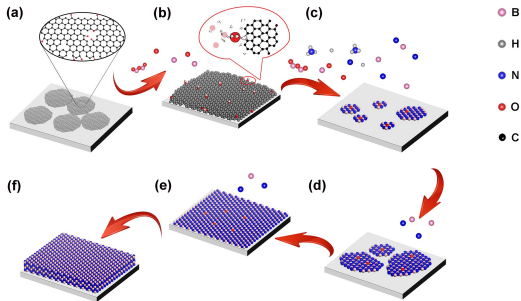

Supplement: d2cc03025j14.pdf [file d2cc03025j14.pdf]

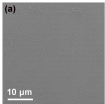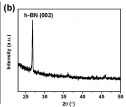

Supplement: d2cc03025j15.pdf [file d2cc03025j15.pdf]

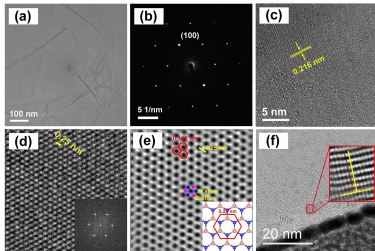

Supplement: d2cc03025j16.pdf [file d2cc03025j16.pdf]

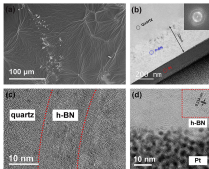

Supplement: d2cc03025j18.pdf [file d2cc03025j18.pdf]

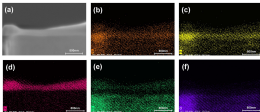

Supplement: d2cc03025j19.pdf [file d2cc03025j19.pdf]

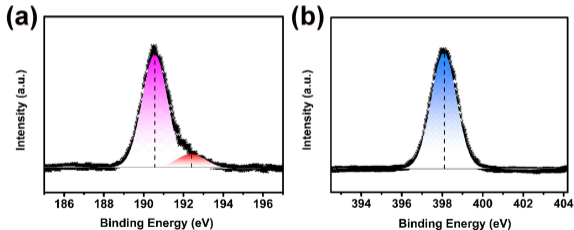

Supplement: d2cc03025j2.pdf [file d2cc03025j2.pdf]

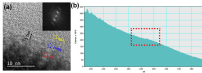

Supplement: d2cc03025j20.pdf [file d2cc03025j20.pdf]

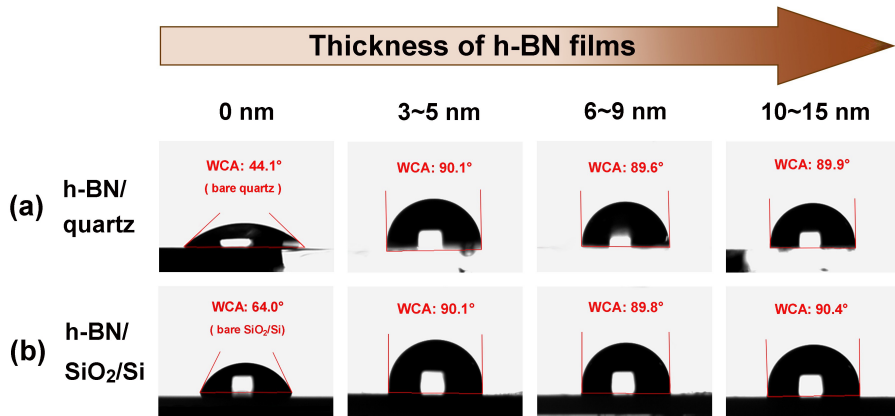

Supplement: d2cc03025j21.pdf [file d2cc03025j21.pdf]

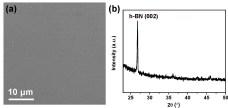

Supplement: d2cc03025j6.pdf [file d2cc03025j6.pdf]

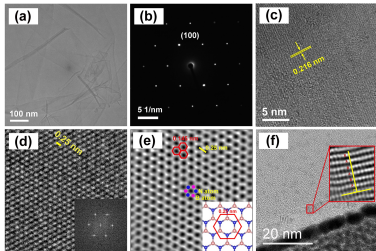

Supplement: d2cc03025j7.pdf [file d2cc03025j7.pdf]

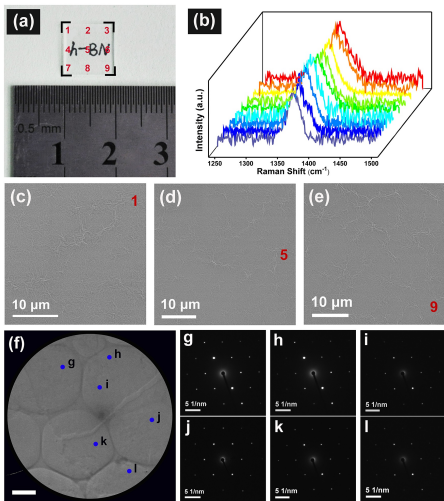

Supplement: d2cc03025j8.pdf [file d2cc03025j8.pdf]
